# Supplementary material for: The Positive Effect of Formaldehyde on the Photocatalytic Renoxification of Nitrate on TiO 2 Particles
Source: Copernicus journal article supplement (doi:10.5194/acp-2022-6), 2022-01-27
Supplement: Supplementary file 1 [file acp-2022-6-supplement-version2.pdf]

*Supplement of*

**The Positive Effect of Formaldehyde on the Photocatalytic  
Renoxification of Nitrate on TiO<sub>2</sub> Particles**

Yuhan Liu, Xuejiao Wang, Mengshuang Sheng, Chunxiang Ye, Jing Shang\*

*State Key Joint Laboratory of Environmental Simulation and Pollution Control,  
College of Environmental Sciences and Engineering, Peking University, 5 Yiheyuan  
Road, Beijing 100871, P. R. China*

Correspondence to: shangjing@pku.edu.cn

The supporting information has 9 pages, 1 table, and 13 figures.

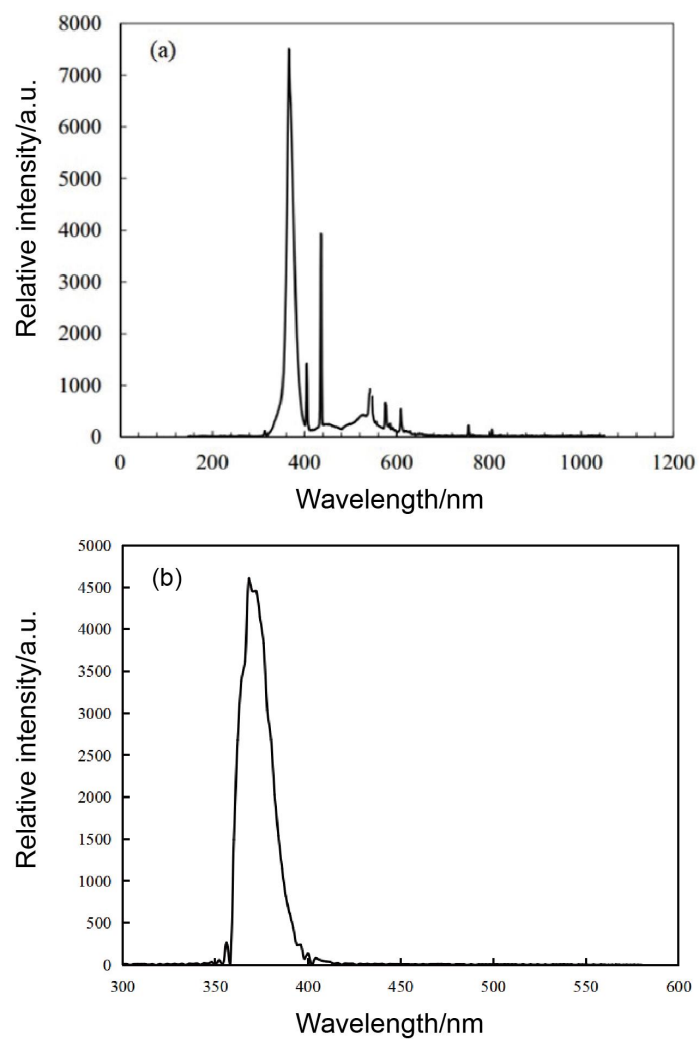

**Figure S1.** Spectral energy distribution of (a) 365 nm tube lamps and (b) 365 nm LED lamps.

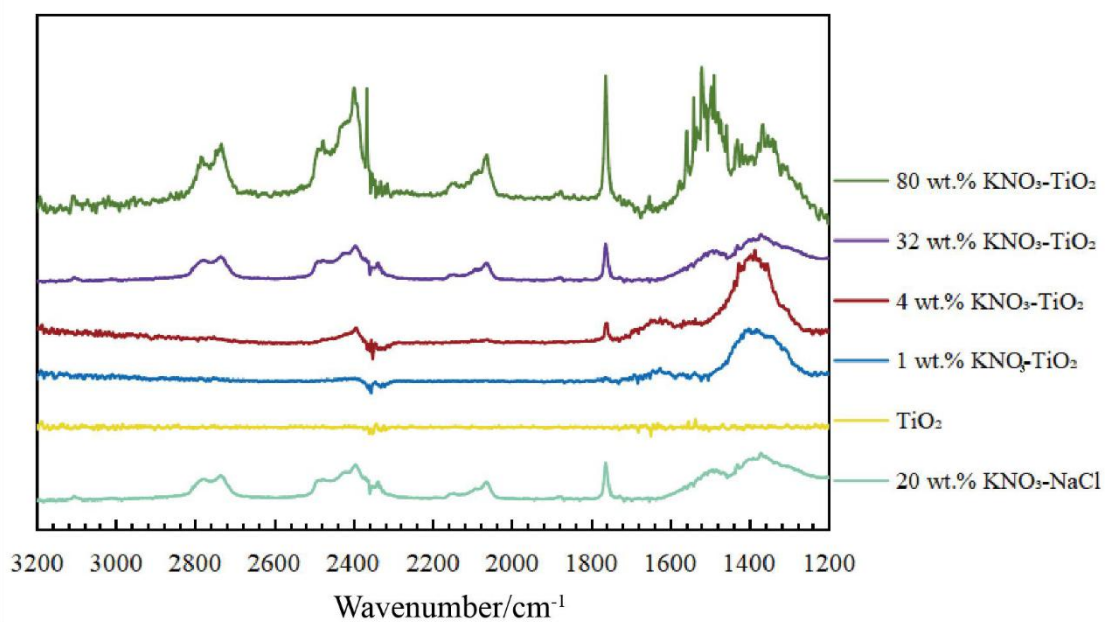

**Figure S2.** DRIFTS spectra of  $\text{TiO}_2$  particles compounded with different mass fractions of  $\text{KNO}_3$ .

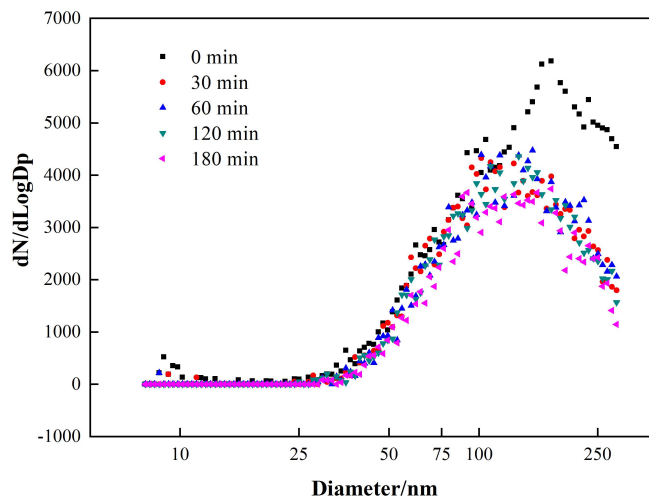

**Figure S3.** Changes of particle size distribution of 4 wt.% KNO<sub>3</sub>-TiO<sub>2</sub> particles in environmental chamber with time.

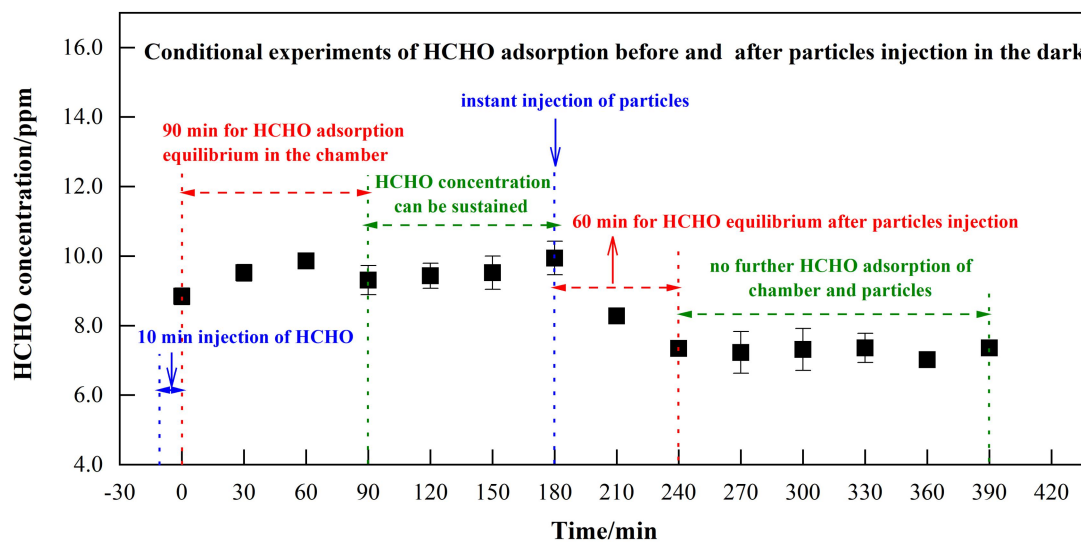

**Figure S4.** The conditional experiments of HCHO concentration in the environmental chamber in the dark before and after the introduction of particles over time.

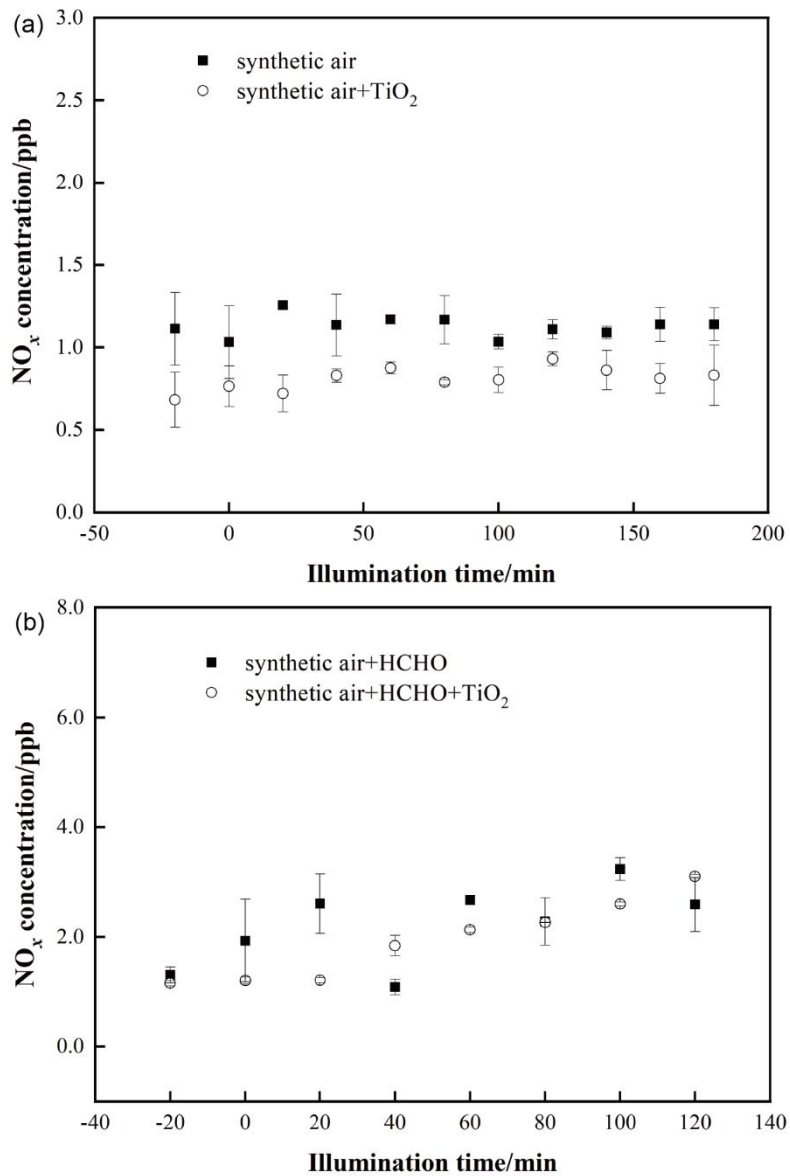

**Figure S5.** Changes of NO<sub>x</sub> concentration in environmental chamber in (a) “synthetic air” and “synthetic air + TiO<sub>2</sub>” system, (b) “synthetic air + HCHO” and “synthetic air + HCHO + TiO<sub>2</sub>” system. 365 nm tube lamps were used during the blank experiment.

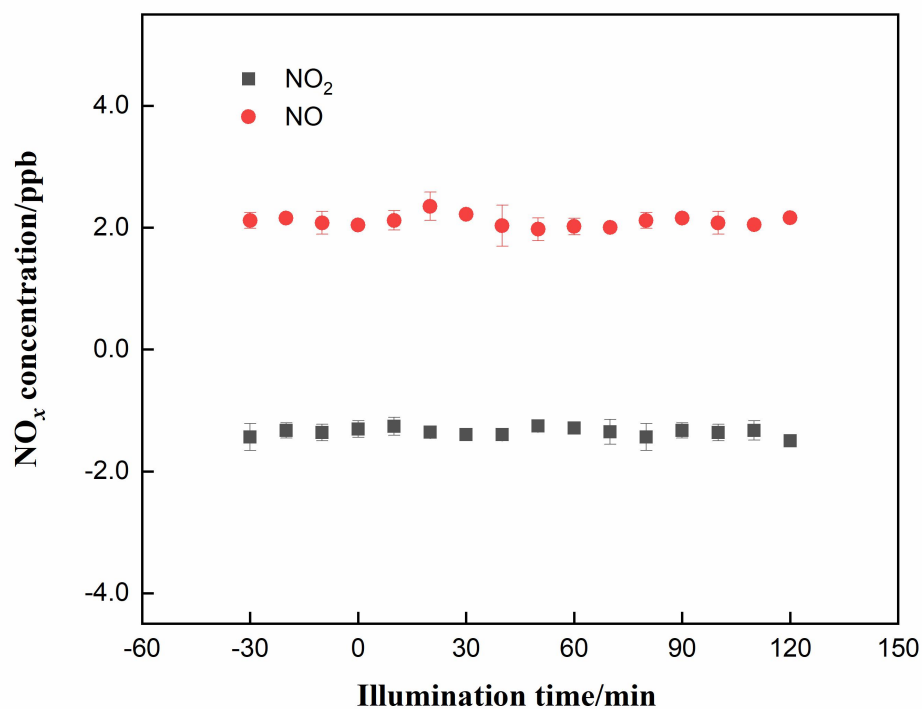

**Figure S6.** Effect of illumination on the release of NO and NO<sub>2</sub> over 4 wt.% KNO<sub>3</sub>-TiO<sub>2</sub> at 293 K and 0.8% of relative humidity. 365 nm LED lamps were used during the illumination experiment.

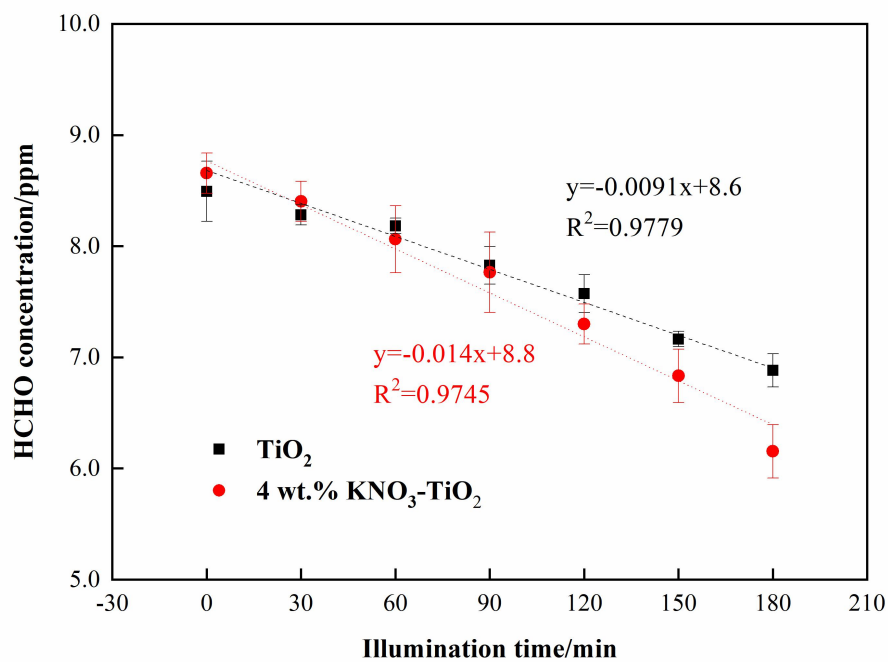

**Figure S7.** Photocatalytic degradation curve of HCHO on TiO<sub>2</sub> and 4 wt.% KNO<sub>3</sub>-TiO<sub>2</sub> particles under 365 nm LED lamps at 293 K and 0.8% of relative humidity.

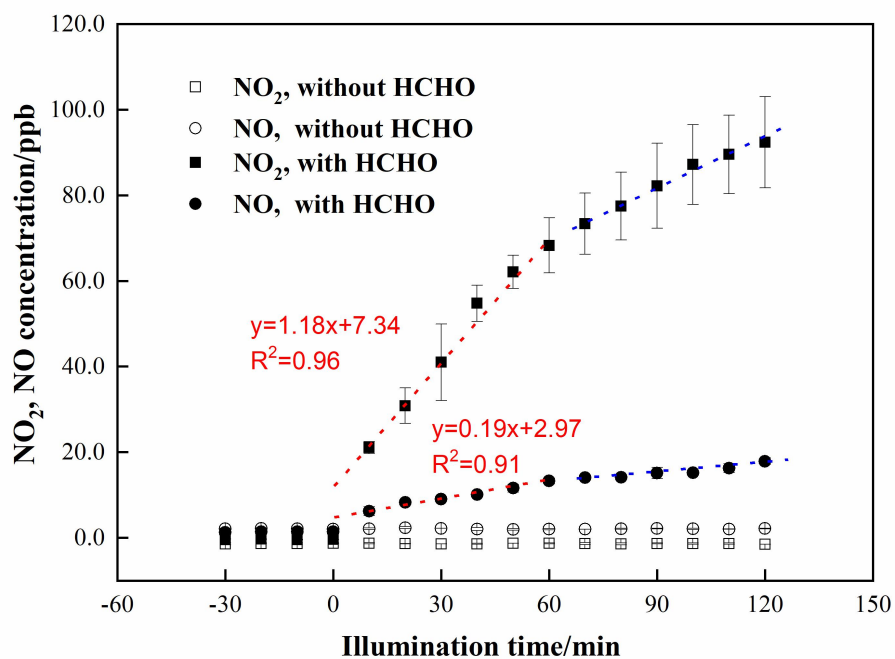

**Figure S8.** Effect of HCHO on the production of NO and NO<sub>2</sub> over 4 wt.% KNO<sub>3</sub>-TiO<sub>2</sub> particles at 293 K and 0.8% of relative humidity. 365 nm LED lamps were used during the illumination experiment. The initial concentration of HCHO was about 9 ppm.

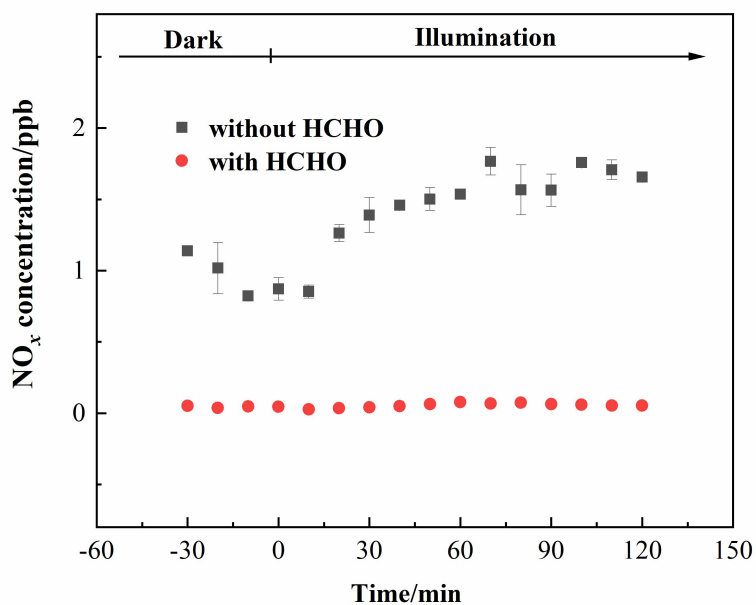

**Figure S9.** Effect of formaldehyde on the renoxification processes of 4 wt.% KNO<sub>3</sub>-SiO<sub>2</sub> particles at 293 K and 0.8% of relative humidity. 365 nm LED lamps were used during the irradiation experiment. The initial concentration of HCHO was about 9 ppm.

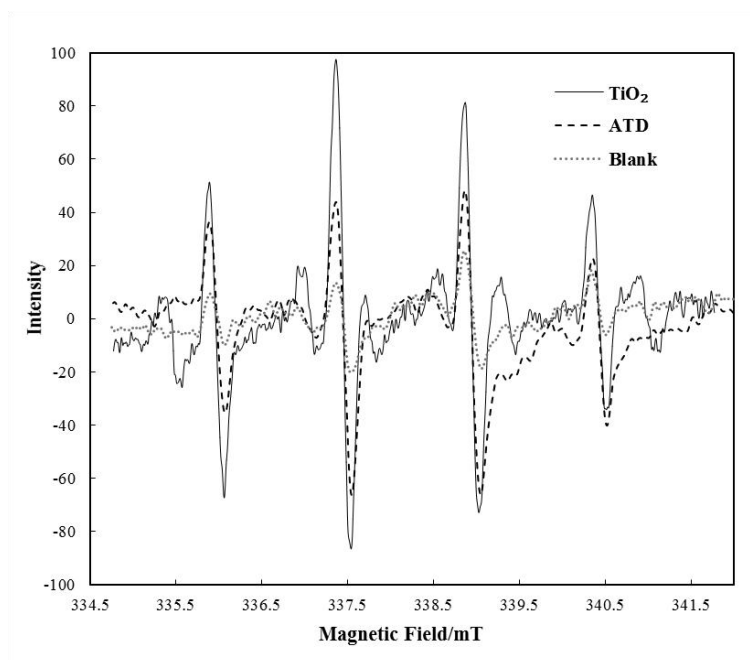

**Figure S10.** ESR spectra of irradiated TiO<sub>2</sub> and ATD particles.

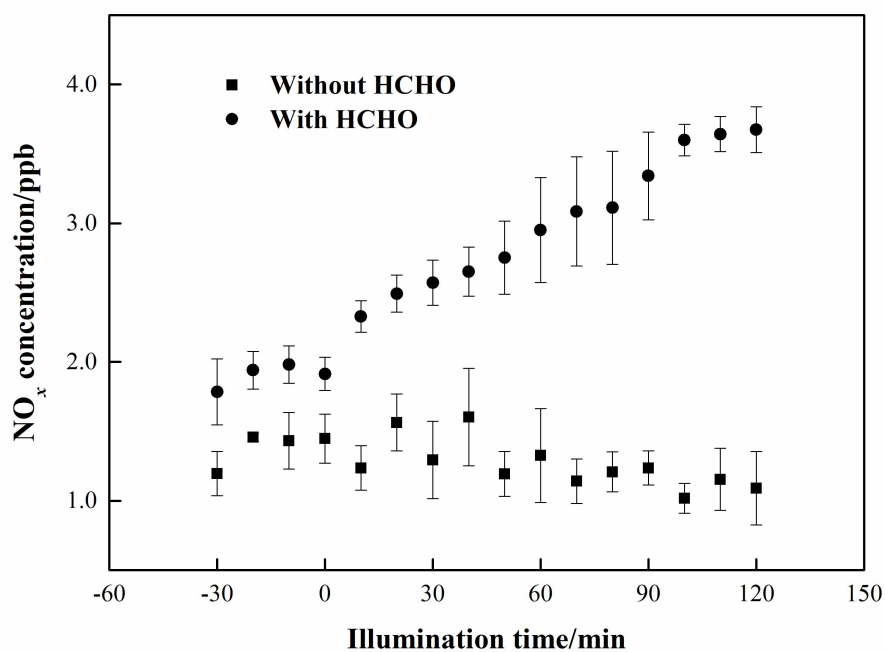

**Figure S11.** Effect of HCHO on the renoxification processes of Arizona Text Dust (ATD) at 293 K and 0.8% of relative humidity. 365 nm LED lamps were used during the illumination experiment.

The initial concentration of HCHO was about 9 ppm.

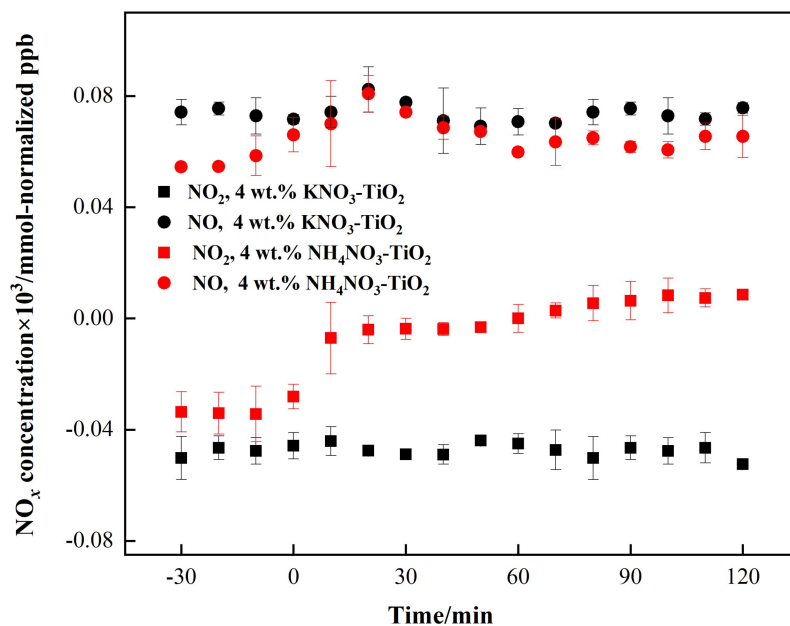

**Figure S12.** Change of NO<sub>x</sub> concentration over 4 wt.% KNO<sub>3</sub>-TiO<sub>2</sub> and 4 wt.% NH<sub>4</sub>NO<sub>3</sub>-TiO<sub>2</sub> particles at 293 K and 0.8% of relative humidity. 365 nm LED lamps were used during the illumination experiment.

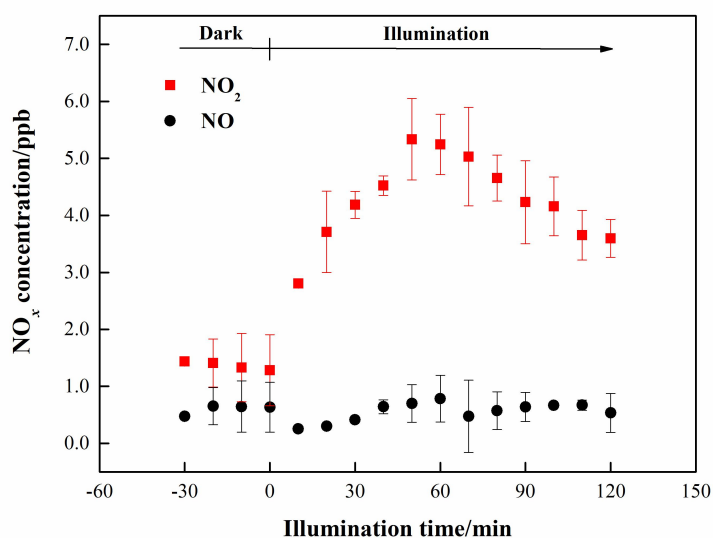

**Figure S13.** The release of NO<sub>2</sub> and NO with 365 nm LED lamps illumination over 4 wt.% KNO<sub>3</sub>-TiO<sub>2</sub> particles at 293 K and 0.8% RH. The initial concentration of HCHO was about 1.0 ppm.



**Table S1.** Arizona Test Dust (ATD) chemical composition.

| Chemical composition           | Weight percentage (%) |
|--------------------------------|-----------------------|
| SiO <sub>2</sub>               | 68-76                 |
| Al <sub>2</sub> O <sub>3</sub> | 10-15                 |
| Fe <sub>2</sub> O <sub>3</sub> | 2.0-5.0               |
| Na <sub>2</sub> O              | 2.0-4.0               |
| CaO                            | 2.0-5.0               |
| MgO                            | 1.0-2.0               |
| TiO <sub>2</sub>               | 0.5-1.0               |
| K <sub>2</sub> O               | 2.0-5.0               |

\*Loss on Ignition 2-5 %
